# Supplementary material
Source: ML conference proceedings conference paper supplement (https://proceedings.neurips.cc/paper_files/paper/2012/hash/2ab56412b1163ee131e1246da0955bd1-Abstract.html)
Supplement: Supplementary file [file 2ab56412b1163ee131e1246da0955bd1-Supplemental.zip]

## Supplementary Material: Multi-Stage Multi-Task Feature Learning

In this supplementary material, we provide detailed proofs for Lemmas 1-4. In our proofs, we use several lemmas (summarized in part B) from Zhang (2010) [26].

We first introduce some notations used in the proof. Define

$$\pi_i(k_i, s_i) = \sup_{\mathbf{v} \in \mathbb{R}^{k_i}, \mathbf{u} \in \mathbb{R}^{s_i}, \mathcal{I}_i, \mathcal{J}_i} \frac{\mathbf{v}^T A_{\mathcal{I}_i, \mathcal{J}_i}^{(i)} \mathbf{u} \|\mathbf{v}\|}{\mathbf{v}^T A_{\mathcal{I}_i, \mathcal{I}_i}^{(i)} \mathbf{v} \|\mathbf{u}\|_\infty}, \quad (16)$$

where  $s_i + k_i \leq d$  with  $s_i, k_i \geq 1$ ;  $\mathcal{I}_i$  and  $\mathcal{J}_i$  are *disjoint* subsets of  $\mathbb{N}_d$  with  $k_i$  and  $s_i$  elements respectively (with some abuse of notation, we also let  $\mathcal{I}_i$  be a subset of  $\mathbb{N}_d \times \{i\}$ , depending on the context.);  $A_{\mathcal{I}_i, \mathcal{J}_i}^{(i)}$  is a sub-matrix of  $A_i = n^{-1} X_i^T X_i \in \mathbb{R}^{d \times d}$  with rows indexed by  $\mathcal{I}_i$  and columns indexed by  $\mathcal{J}_i$ .

We let  $\mathbf{w}_{\mathcal{I}_i}$  be a  $d \times 1$  vector with the  $j$ -th entry being  $w_{ji}$ , if  $(j, i) \in \mathcal{I}_i$ , and 0, otherwise. We also let  $W_{\mathcal{I}}$  be a  $d \times m$  matrix with  $(j, i)$ -th entry being  $w_{ji}$ , if  $(j, i) \in \mathcal{I}$ , and 0, otherwise.

### A. Proofs of Lemmas 1-4

#### A.1. Proof of Lemma 1

**Proof** For the  $j$ -th entry of  $\bar{\epsilon}_i$  ( $j \in \mathbb{N}_d$ ):

$$|\bar{\epsilon}_{ji}| = \frac{1}{n} \left| \left( \mathbf{x}_j^{(i)} \right)^T (X_i \bar{\mathbf{w}}_i - \mathbf{y}_i) \right| = \frac{1}{n} \left| \left( \mathbf{x}_j^{(i)} \right)^T \boldsymbol{\delta}_i \right|,$$

where  $\mathbf{x}_j^{(i)}$  is the  $j$ -th column of  $X_i$ . We know that the entries of  $\boldsymbol{\delta}_i$  are independent sub-Gaussian random variables, and  $\|1/n \mathbf{x}_j^{(i)}\|^2 = \|\mathbf{x}_j^{(i)}\|^2/n^2 \leq \rho_i^+(1)/n$ . According to Lemma 5, we have  $\forall t > 0$ :

$$\Pr(|\bar{\epsilon}_{ji}| \geq t) \leq 2 \exp(-nt^2/(2\sigma^2 \rho_i^+(1))) \leq 2 \exp(-nt^2/(2\sigma^2 \rho_{max}^+(1))).$$

Thus we obtain:

$$\Pr(\|\tilde{\mathbf{Y}}\|_{\infty, \infty} \leq t) \geq 1 - 2dm \exp(-nt^2/(2\sigma^2 \rho_{max}^+(1))).$$

Let  $\eta = 2dm \exp(-nt^2/(2\sigma^2 \rho_{max}^+(1)))$  and we can obtain Eq. (10). Eq. (11) directly follows from Lemma 8 and the following fact:

$$\|\mathbf{x}_i\|^2 \leq ay_i \Rightarrow \|X\|_F^2 = \sum_{i=1}^m \|\mathbf{x}_i\|^2 \leq ma \max_{i \in \mathbb{N}_m} y_i.$$

□

#### A.2 Proof of Lemma 2

**Proof** The optimality condition of Eq. (2) implies that

$$\frac{2}{n} X_i^T (X_i \hat{\mathbf{w}}_i - \mathbf{y}_i) + \hat{\boldsymbol{\lambda}}_i \odot \text{sign}(\hat{\mathbf{w}}_i) = \mathbf{0},$$

where  $\odot$  denotes the element-wise product;  $\text{sign}(\mathbf{w}) = [\text{sign}(w_1), \dots, \text{sign}(w_d)]^T$ , where  $\text{sign}(w_i) = 1$ , if  $w_i > 0$ ;  $\text{sign}(w_i) = -1$ , if  $w_i < 0$ ; and  $\text{sign}(w_i) \in [-1, 1]$ , otherwise. We note that  $X_i \hat{\mathbf{w}}_i - \mathbf{y}_i = X_i \hat{\mathbf{w}}_i - X_i \bar{\mathbf{w}}_i + X_i \bar{\mathbf{w}}_i - \mathbf{y}_i$  and we can rewrite the above equation into the following form:

$$2A_i \Delta \hat{\mathbf{w}}_i = -2\bar{\epsilon}_i - \hat{\boldsymbol{\lambda}}_i \odot \text{sign}(\hat{\mathbf{w}}_i).$$

Thus, for all  $\mathbf{v} \in \mathbb{R}^d$ , we have

$$2\mathbf{v}^T A_i \Delta \hat{\mathbf{w}}_i = -2\mathbf{v}^T \bar{\mathbf{e}}_i - \sum_{j=1}^d \hat{\lambda}_{ji} v_j \text{sign}(\hat{w}_{ji}). \quad (17)$$

Letting  $\mathbf{v} = \Delta \hat{\mathbf{w}}_i$  and noticing that  $\Delta \hat{w}_{ji} = \hat{w}_{ji}$  for  $(j, i) \notin \bar{\mathcal{F}}_i, i \in \mathbb{N}_m$ , we obtain

$$\begin{aligned} 0 &\leq 2\Delta \hat{\mathbf{w}}_i^T A_i \Delta \hat{\mathbf{w}}_i = -2\Delta \hat{\mathbf{w}}_i^T \bar{\mathbf{e}}_i - \sum_{j=1}^d \hat{\lambda}_{ji} \Delta \hat{w}_{ji} \text{sign}(\hat{w}_{ji}) \\ &\leq 2\|\Delta \hat{\mathbf{w}}_i\|_1 \|\bar{\mathbf{e}}_i\|_\infty - \sum_{(j,i) \in \bar{\mathcal{F}}_i} \hat{\lambda}_{ji} \Delta \hat{w}_{ji} \text{sign}(\hat{w}_{ji}) - \sum_{(j,i) \notin \bar{\mathcal{F}}_i} \hat{\lambda}_{ji} \Delta \hat{w}_{ji} \text{sign}(\hat{w}_{ji}) \\ &\leq 2\|\Delta \hat{\mathbf{w}}_i\|_1 \|\bar{\mathbf{e}}_i\|_\infty + \sum_{(j,i) \in \bar{\mathcal{F}}_i} \hat{\lambda}_{ji} |\Delta \hat{w}_{ji}| - \sum_{(j,i) \notin \bar{\mathcal{F}}_i} \hat{\lambda}_{ji} |\hat{w}_{ji}| \\ &\leq 2\|\Delta \hat{\mathbf{w}}_i\|_1 \|\bar{\mathbf{e}}_i\|_\infty + \sum_{(j,i) \in \bar{\mathcal{F}}_i} \hat{\lambda}_{ji} |\Delta \hat{w}_{ji}| - \sum_{(j,i) \in \mathcal{G}_i} \hat{\lambda}_{ji} |\hat{w}_{ji}| \\ &\leq 2\|\Delta \hat{\mathbf{w}}_i\|_1 \|\bar{\mathbf{e}}_i\|_\infty + \sum_{(j,i) \in \bar{\mathcal{F}}_i} \hat{\lambda}_{0i} |\Delta \hat{w}_{ji}| - \sum_{(j,i) \in \mathcal{G}_i} \hat{\lambda}_{\mathcal{G}_i} |\hat{w}_{ji}| \\ &= \sum_{(j,i) \in \mathcal{G}_i} (2\|\bar{\mathbf{e}}_i\|_\infty - \hat{\lambda}_{\mathcal{G}_i}) |\hat{w}_{ji}| + \sum_{(j,i) \notin \bar{\mathcal{F}}_i \cup \mathcal{G}_i} 2\|\bar{\mathbf{e}}_i\|_\infty |\hat{w}_{ji}| + \sum_{(j,i) \in \bar{\mathcal{F}}_i} (2\|\bar{\mathbf{e}}_i\|_\infty + \hat{\lambda}_{0i}) |\Delta \hat{w}_{ji}|. \end{aligned}$$

The last equality above is due to  $\mathbb{N}_d \times \{i\} = \mathcal{G}_i \cup (\bar{\mathcal{F}}_i \cup \mathcal{G}_i)^c \cup \bar{\mathcal{F}}_i$  and  $\Delta \hat{w}_{ji} = \hat{w}_{ji}, \forall (j, i) \notin \bar{\mathcal{F}}_i \supseteq \mathcal{G}_i$ .

Rearranging the above inequality and noticing that  $2\|\bar{\mathbf{e}}_i\|_\infty < \hat{\lambda}_{\mathcal{G}_i} \leq \hat{\lambda}_{0i}$ , we obtain:

$$\sum_{(j,i) \in \mathcal{G}_i} |\hat{w}_{ji}| \leq \frac{2\|\bar{\mathbf{e}}_i\|_\infty}{\hat{\lambda}_{\mathcal{G}_i} - 2\|\bar{\mathbf{e}}_i\|_\infty} \sum_{(j,i) \notin \bar{\mathcal{F}}_i \cup \mathcal{G}_i} |\hat{w}_{ji}| + \frac{2\|\bar{\mathbf{e}}_i\|_\infty + \hat{\lambda}_{0i}}{\hat{\lambda}_{\mathcal{G}_i} - 2\|\bar{\mathbf{e}}_i\|_\infty} \sum_{(j,i) \in \bar{\mathcal{F}}_i} |\Delta \hat{w}_{ji}| \leq \frac{2\|\bar{\mathbf{e}}_i\|_\infty + \hat{\lambda}_{0i}}{\hat{\lambda}_{\mathcal{G}_i} - 2\|\bar{\mathbf{e}}_i\|_\infty} \|\Delta \hat{\mathbf{w}}_{\mathcal{G}_i^c}\|_1. \quad (18)$$

Then Lemma 2 can be obtained from the above inequality and the following two inequalities.

$$\max_{i \in \mathbb{N}_m} \frac{2\|\bar{\mathbf{e}}_i\|_\infty + \hat{\lambda}_{0i}}{\hat{\lambda}_{\mathcal{G}_i} - 2\|\bar{\mathbf{e}}_i\|_\infty} \leq \frac{2\|\tilde{\mathbf{Y}}\|_{\infty, \infty} + \hat{\lambda}_0}{\hat{\lambda}_{\mathcal{G}} - 2\|\tilde{\mathbf{Y}}\|_{\infty, \infty}} \text{ and } \sum_{i=1}^m x_i y_i \leq \|\mathbf{x}\|_\infty \|\mathbf{y}\|_1.$$

□

### A.3 Proof of Lemma 3

**Proof** According to the definition of  $\mathcal{G}$  ( $\mathcal{G}_{(\ell)}$ ), we know that  $\bar{\mathcal{F}}_i \cap \mathcal{G}_i = \emptyset$  ( $i \in \mathbb{N}_m$ ) and  $\forall (j, i) \in \mathcal{G}$  ( $\mathcal{G}_{(\ell)}$ ),  $\hat{\lambda}_{ji}^{(\ell-1)} = \lambda$ . Thus, all conditions of Lemma 2 are satisfied, by noticing the relationship between Eq. (5) and Eq. (10). Based on the definition of  $\mathcal{G}$  ( $\mathcal{G}_{(\ell)}$ ), we easily obtain  $\forall j \in \mathbb{N}_d$ :

$$(j, i) \in \mathcal{G}_i, \forall i \in \mathbb{N}_m \text{ or } (j, i) \notin \mathcal{G}_i, \forall i \in \mathbb{N}_m. \quad (19)$$

and hence  $k_\ell = |\mathcal{G}_1^c| = \dots = |\mathcal{G}_m^c|$  ( $k_\ell$  is some integer). Now, we assume that at stage  $\ell \geq 1$ :

$$k_\ell = |\mathcal{G}_1^c| = \dots = |\mathcal{G}_m^c| \leq 2\bar{r}. \quad (20)$$

We will show in the second part of this proof that Eq. (20) holds for all  $\ell$ . Based on Lemma 6 and Eq. (4), we have:

$$\pi_i(2\bar{r} + s, s) \leq \frac{s^{1/2}}{2} \sqrt{\rho_i^+(s)/\rho_i^-(2\bar{r} + 2s) - 1} \leq \frac{s^{1/2}}{2} \sqrt{1 + s/(2\bar{r}) - 1} = 0.5s(2\bar{r})^{-1/2},$$

which indicates that

$$0.5 \leq t_i = 1 - \pi_i(2\bar{r} + s, s)(2\bar{r})^{1/2} s^{-1} \leq 1.$$

For all  $t_i \in [0.5, 1]$ , under the conditions of Eq. (5) and Eq. (10), we have

$$\frac{2\|\bar{\epsilon}_i\|_\infty + \lambda}{\lambda - 2\|\bar{\epsilon}_i\|_\infty} \leq \frac{2\|\bar{\Upsilon}\|_{\infty,\infty} + \lambda}{\lambda - 2\|\bar{\Upsilon}\|_{\infty,\infty}} \leq \frac{7}{5} \leq \frac{4 - t_i}{4 - 3t_i} \leq 3.$$

Following Lemma 2, we have

$$\|\hat{W}_{\mathcal{G}}\|_{1,1} \leq 3\|\Delta\hat{W}_{\mathcal{G}^c}\|_{1,1} = 3\|\Delta\hat{W} - \Delta\hat{W}_{\mathcal{G}}\|_{1,1} = 3\|\Delta\hat{W} - \hat{W}_{\mathcal{G}}\|_{1,1}.$$

Therefore

$$\begin{aligned} \|\Delta\hat{W} - \Delta\hat{W}_{\mathcal{I}}\|_{\infty,1} &= \|\Delta\hat{W}_{\mathcal{G}} - \Delta\hat{W}_{\mathcal{I}}\|_{\infty,1} \\ &\leq \|\Delta\hat{W}_{\mathcal{I}}\|_{1,1}/s = (\|\Delta\hat{W}_{\mathcal{G}}\|_{1,1} - \|\Delta\hat{W} - \Delta\hat{W}_{\mathcal{I}}\|_{1,1})/s \\ &\leq s^{-1}(3\|\Delta\hat{W} - \hat{W}_{\mathcal{G}}\|_{1,1} - \|\Delta\hat{W} - \Delta\hat{W}_{\mathcal{I}}\|_{1,1}), \end{aligned}$$

which implies that

$$\begin{aligned} \|\Delta\hat{W}\|_{2,1} - \|\Delta\hat{W}_{\mathcal{I}}\|_{2,1} &\leq \|\Delta\hat{W} - \Delta\hat{W}_{\mathcal{I}}\|_{2,1} \\ &\leq (\|\Delta\hat{W} - \Delta\hat{W}_{\mathcal{I}}\|_{1,1}\|\Delta\hat{W} - \Delta\hat{W}_{\mathcal{I}}\|_{\infty,1})^{1/2} \\ &\leq \left(\|\Delta\hat{W} - \Delta\hat{W}_{\mathcal{I}}\|_{1,1}\right)^{1/2} \left(s^{-1}(3\|\Delta\hat{W} - \hat{W}_{\mathcal{G}}\|_{1,1} - \|\Delta\hat{W} - \Delta\hat{W}_{\mathcal{I}}\|_{1,1})\right)^{1/2} \\ &\leq \left(\left(3\|\Delta\hat{W} - \hat{W}_{\mathcal{G}}\|_{1,1}/2\right)^2\right)^{1/2} s^{-1/2} \\ &\leq (3/2)s^{-1/2}(2\bar{r})^{1/2}\|\Delta\hat{W} - \hat{W}_{\mathcal{G}}\|_{2,1} \\ &\leq (3/2)(2\bar{r}/s)^{1/2}\|\Delta\hat{W}_{\mathcal{I}}\|_{2,1}. \end{aligned}$$

In the above derivation, the third inequality is due to  $a(3b - a) \leq (3b/2)^2$ , and the fourth inequality follows from Eq. (20) and  $\bar{\mathcal{F}} \cap \mathcal{G} = \emptyset \Rightarrow \Delta\hat{W}_{\mathcal{G}} = \hat{W}_{\mathcal{G}}$ . Rearranging the above inequality, we obtain at stage  $\ell$ :

$$\|\Delta\hat{W}\|_{2,1} \leq \left(1 + 1.5\sqrt{\frac{2\bar{r}}{s}}\right) \|\Delta\hat{W}_{\mathcal{I}}\|_{2,1}. \quad (21)$$

From Lemma 7, we have:

$$\begin{aligned} &\max(0, \Delta\hat{\mathbf{w}}_{\mathcal{I}_i}^T A_i \Delta\hat{\mathbf{w}}_i) \\ &\geq \rho_i^-(k_\ell + s)(\|\Delta\hat{\mathbf{w}}_{\mathcal{I}_i}\| - \pi_i(k_\ell + s, s)\|\hat{\mathbf{w}}_{\mathcal{G}_i}\|_1/s)\|\Delta\hat{\mathbf{w}}_{\mathcal{I}_i}\| \\ &\geq \rho_i^-(k_\ell + s)[1 - (1 - t_i)(4 - t_i)/(4 - 3t_i)]\|\Delta\hat{\mathbf{w}}_{\mathcal{I}_i}\|^2 \\ &\geq 0.5t_i\rho_i^-(k_\ell + s)\|\Delta\hat{\mathbf{w}}_{\mathcal{I}_i}\|^2 \\ &\geq 0.25\rho_i^-(2\bar{r} + s)\|\Delta\hat{\mathbf{w}}_{\mathcal{I}_i}\|^2 \\ &\geq 0.25\rho_{min}^-(2\bar{r} + s)\|\Delta\hat{\mathbf{w}}_{\mathcal{I}_i}\|^2, \end{aligned}$$

where the second inequality is due to Eq. (18), that is

$$\begin{aligned} \|\hat{\mathbf{w}}_{\mathcal{G}_i}\|_1 &\leq \frac{2\|\bar{\epsilon}_i\|_\infty + \hat{\lambda}_{0i}}{\hat{\lambda}_{\mathcal{G}_i} - 2\|\bar{\epsilon}_i\|_\infty} \|\Delta\hat{\mathbf{w}}_{\mathcal{G}_i^c}\|_1 \leq \frac{(2\|\bar{\epsilon}_i\|_\infty + \hat{\lambda}_{0i})\sqrt{k_\ell}}{\hat{\lambda}_{\mathcal{G}_i} - 2\|\bar{\epsilon}_i\|_\infty} \|\Delta\hat{\mathbf{w}}_{\mathcal{G}_i^c}\| \\ &\leq \frac{(2\|\bar{\epsilon}_i\|_\infty + \hat{\lambda}_{0i})\sqrt{k_\ell}}{\hat{\lambda}_{\mathcal{G}_i} - 2\|\bar{\epsilon}_i\|_\infty} \|\Delta\hat{\mathbf{w}}_{\mathcal{I}_i}\| \leq \frac{(4 - t_i)\sqrt{k_\ell}}{4 - 3t_i} \|\Delta\hat{\mathbf{w}}_{\mathcal{I}_i}\|; \end{aligned}$$

the third inequality follows from  $1 - (1 - t_i)(4 - t_i)/(4 - 3t_i) \geq 0.5t_i$  for  $t_i \in [0.5, 1]$  and the fourth inequality follows from the assumption in Eq. (20) and  $t_i \geq 0.5$ .

If  $\Delta\hat{\mathbf{w}}_{\mathcal{I}_i}^T A_i \Delta\hat{\mathbf{w}}_i \leq 0$ , then  $\|\Delta\hat{\mathbf{w}}_{\mathcal{I}_i}\| = 0$ . If  $\Delta\hat{\mathbf{w}}_{\mathcal{I}_i}^T A_i \Delta\hat{\mathbf{w}}_i > 0$ , then we have

$$\Delta\hat{\mathbf{w}}_{\mathcal{I}_i}^T A_i \Delta\hat{\mathbf{w}}_i \geq 0.25\rho_{min}^-(2\bar{r} + s)\|\Delta\hat{\mathbf{w}}_{\mathcal{I}_i}\|^2. \quad (22)$$

By letting  $\mathbf{v} = \Delta \hat{\mathbf{w}}_{\mathcal{I}_i}$ , we obtain the following from Eq. (17):

$$\begin{aligned}
2\Delta \hat{\mathbf{w}}_{\mathcal{I}_i}^T A_i \Delta \hat{\mathbf{w}}_i &= -2\Delta \hat{\mathbf{w}}_{\mathcal{I}_i}^T \bar{\epsilon}_i - \sum_{(j,i) \in \mathcal{I}_i} \hat{\lambda}_{ji} \Delta \hat{w}_{ji} \text{sign}(\hat{w}_{ji}) \\
&= -2\Delta \hat{\mathbf{w}}_{\mathcal{I}_i}^T \bar{\epsilon}_{\mathcal{G}_i^c} - 2\Delta \hat{\mathbf{w}}_{\mathcal{I}_i}^T \bar{\epsilon}_{\mathcal{J}_i} - \sum_{(j,i) \in \bar{\mathcal{F}}_i} \hat{\lambda}_{ji} \Delta \hat{w}_{ji} \text{sign}(\hat{w}_{ji}) - \sum_{(j,i) \in \mathcal{J}_i} \hat{\lambda}_{ji} |\Delta \hat{w}_{ji}| - \sum_{(j,i) \in \bar{\mathcal{F}}_i^c \cap \mathcal{G}_i^c} \hat{\lambda}_{ji} |\Delta \hat{w}_{ji}| \\
&= -2\Delta \hat{\mathbf{w}}_{\mathcal{I}_i}^T \bar{\epsilon}_{\mathcal{G}_i^c} - 2\Delta \hat{\mathbf{w}}_{\mathcal{J}_i}^T \bar{\epsilon}_{\mathcal{J}_i} - \sum_{(j,i) \in \bar{\mathcal{F}}_i} \hat{\lambda}_{ji} \Delta \hat{w}_{ji} \text{sign}(\hat{w}_{ji}) - \sum_{(j,i) \in \mathcal{J}_i} \hat{\lambda}_{ji} |\Delta \hat{w}_{ji}| - \sum_{(j,i) \in \bar{\mathcal{F}}_i^c \cap \mathcal{G}_i^c} \hat{\lambda}_{ji} |\Delta \hat{w}_{ji}| \\
&\leq 2\|\Delta \hat{\mathbf{w}}_{\mathcal{I}_i}\| \|\bar{\epsilon}_{\mathcal{G}_i^c}\| + 2\|\bar{\epsilon}_{\mathcal{J}_i}\|_\infty \sum_{(j,i) \in \mathcal{J}_i} |\Delta \hat{w}_{ji}| + \sum_{(j,i) \in \bar{\mathcal{F}}_i} \hat{\lambda}_{ji} |\Delta \hat{w}_{ji}| - \sum_{(j,i) \in \mathcal{J}_i} \hat{\lambda}_{ji} |\Delta \hat{w}_{ji}| \\
&\leq 2\|\Delta \hat{\mathbf{w}}_{\mathcal{I}_i}\| \|\bar{\epsilon}_{\mathcal{G}_i^c}\| + \left( \sum_{(j,i) \in \bar{\mathcal{F}}_i} \hat{\lambda}_{ji}^2 \right)^{1/2} \|\Delta \hat{\mathbf{w}}_{\bar{\mathcal{F}}_i}\| \\
&\leq 2\|\Delta \hat{\mathbf{w}}_{\mathcal{I}_i}\| \|\bar{\epsilon}_{\mathcal{G}_i^c}\| + \left( \sum_{(j,i) \in \bar{\mathcal{F}}_i} \hat{\lambda}_{ji}^2 \right)^{1/2} \|\Delta \hat{\mathbf{w}}_{\mathcal{I}_i}\|. \tag{23}
\end{aligned}$$

In the above derivation, the second equality is due to  $\mathcal{I}_i = \mathcal{J}_i \cup \bar{\mathcal{F}}_i \cup (\bar{\mathcal{F}}_i^c \cap \mathcal{G}_i^c)$ ; the third equality is due to  $\mathcal{I}_i \cap \mathcal{G}_i = \mathcal{J}_i$ ; the second inequality follows from  $\forall (j,i) \in \mathcal{J}_i, \hat{\lambda}_{ji} = \lambda \geq 2\|\bar{\epsilon}_i\|_\infty \geq 2\|\bar{\epsilon}_{\mathcal{J}_i}\|_\infty$  and the last inequality follows from  $\bar{\mathcal{F}}_i \subseteq \mathcal{G}_i^c \subseteq \mathcal{I}_i$ . Combining Eq. (22) and Eq. (23), we have

$$\|\Delta \hat{\mathbf{w}}_{\mathcal{I}_i}\| \leq \frac{2}{\rho_{\min}^-(2\bar{r} + s)} \left[ 2\|\bar{\epsilon}_{\mathcal{G}_i^c}\| + \left( \sum_{(j,i) \in \bar{\mathcal{F}}_i} \hat{\lambda}_{ji}^2 \right)^{1/2} \right].$$

Notice that

$$\|\mathbf{x}_i\| \leq a(\|\mathbf{y}_i\| + \|\mathbf{z}_i\|) \Rightarrow \|X\|_{2,1}^2 \leq m\|X\|_F^2 = m \sum_i \|\mathbf{x}_i\|^2 \leq 2ma^2(\|Y\|_F^2 + \|Z\|_F^2).$$

Thus, we have

$$\|\Delta \hat{\mathbf{w}}_{\mathcal{I}}\|_{2,1} \leq \frac{\sqrt{8m \left( 4\|\tilde{\Upsilon}_{\mathcal{G}_{(\ell)}}\|_F^2 + \sum_{(j,i) \in \bar{\mathcal{F}}} (\hat{\lambda}_{ji}^{(\ell-1)})^2 \right)}}{\rho_{\min}^-(2\bar{r} + s)}. \tag{24}$$

Therefore, at stage  $\ell$ , Eq. (12) in Lemma 3 directly follows from Eq. (21) and Eq. (24). Following Eq. (12), we have:

$$\begin{aligned}
\|\hat{\mathbf{W}}^{(\ell)} - \bar{\mathbf{W}}\|_{2,1} &= \|\Delta \hat{\mathbf{W}}^{(\ell)}\|_{2,1} \\
&\leq \frac{\left( 1 + 1.5\sqrt{\frac{2\bar{r}}{s}} \right) \sqrt{8m \left( 4\|\tilde{\Upsilon}_{\mathcal{G}_{(\ell)}}\|_F^2 + \sum_{(j,i) \in \bar{\mathcal{F}}} (\hat{\lambda}_{ji}^{(\ell-1)})^2 \right)}}{\rho_{\min}^-(2\bar{r} + s)} \\
&\leq \frac{8.83\sqrt{m} \sqrt{4\|\Upsilon\|_{\infty,\infty}^2 |\mathcal{G}_{(\ell)}^c| + \bar{r}m\lambda^2}}{\rho_{\min}^-(2\bar{r} + s)} \\
&\leq \frac{8.83\sqrt{m}\lambda \sqrt{\frac{8}{144}\bar{r}m + \bar{r}m}}{\rho_{\min}^-(2\bar{r} + s)} \leq \frac{9.1m\lambda\sqrt{\bar{r}}}{\rho_{\min}^-(2\bar{r} + s)},
\end{aligned}$$

where the first inequality is due to Eq. (24); the second inequality is due to  $s \geq \bar{r}$  (assumption in Theorem 1),  $\hat{\lambda}_{ji} \leq \lambda$ ,  $\bar{r}m = |\bar{\mathcal{H}}| \geq |\bar{\mathcal{F}}|$  and the third inequality follows from Eq. (20) and  $\|\tilde{\Upsilon}\|_{\infty,\infty}^2 \leq (1/144)\lambda^2$ . Therefore, Eq. (13) in Lemma 3 holds at stage  $\ell$ .

Notice that we obtain Lemma 3 at stage  $\ell$ , by assuming that Eq. (20) is satisfied. To prove that Lemma 3 holds for all stages, we next need to prove by induction that Eq. (20) holds at all stages.

When  $\ell = 1$ , we have  $\mathcal{G}_{(1)}^c = \bar{\mathcal{H}}$ , which implies that Eq. (20) holds. Now, we assume that Eq. (20) holds at stage  $\ell$ . Thus, by hypothesis induction, we have:

$$\begin{aligned} \sqrt{|\mathcal{G}_{(\ell+1)}^c \setminus \bar{\mathcal{H}}|} &\leq \sqrt{m\theta^{-2} \|\hat{W}_{\mathcal{G}_{(\ell+1)}^c \setminus \bar{\mathcal{H}}}^{(\ell)} - \bar{W}_{\mathcal{G}_{(\ell+1)}^c \setminus \bar{\mathcal{H}}}\|_{2,1}^2} \\ &\leq \sqrt{m}\theta^{-1} \left\| \hat{W}^{(\ell)} - \bar{W} \right\|_{2,1} \leq \frac{9.1m^{3/2}\lambda\sqrt{\bar{r}}\theta^{-1}}{\rho_{min}^-(2\bar{r} + s)} \leq \sqrt{\bar{r}m}, \end{aligned}$$

where  $\theta$  is the thresholding parameter in Eq. (1); the first inequality above follows from the definition of  $\mathcal{G}_{(\ell)}$  in Lemma 3:

$$\begin{aligned} \forall (j, i) \in \mathcal{G}_{(\ell+1)}^c \setminus \bar{\mathcal{H}}, \|\hat{\mathbf{w}}^{(\ell)}\|_1^2 / \theta^2 &= \|(\hat{\mathbf{w}}^{(\ell)})^j - \bar{\mathbf{w}}^j\|_1^2 / \theta^2 \geq 1 \\ \Rightarrow |\mathcal{G}_{(\ell+1)}^c \setminus \bar{\mathcal{H}}| &\leq m\theta^{-2} \|\hat{W}_{\mathcal{G}_{(\ell+1)}^c \setminus \bar{\mathcal{H}}}^{(\ell)} - \bar{W}_{\mathcal{G}_{(\ell+1)}^c \setminus \bar{\mathcal{H}}}\|_{2,1}^2; \end{aligned}$$

the last inequality is due to Eq. (6). Thus, we have:

$$|\mathcal{G}_{(\ell+1)}^c \setminus \bar{\mathcal{H}}| \leq \bar{r}m \Rightarrow |\mathcal{G}_{(\ell+1)}^c| \leq 2\bar{r}m \Rightarrow k_{\ell+1} \leq 2\bar{r}.$$

Therefore, Eq. (20) holds at all stages. Thus the two inequalities in Lemma 3 hold at all stages. This completes the proof of the lemma.  $\square$

#### A.4 Proof of Lemma 4

**Proof** The first inequality directly follows from  $\bar{\mathcal{H}} \supseteq \bar{\mathcal{F}}$ . Next, we focus on the second inequality. For each  $(j, i) \in \bar{\mathcal{F}} \setminus \bar{\mathcal{H}}$ , if  $\|\hat{\mathbf{w}}^j\|_1 < \theta$ , by considering Eq. (3), we have

$$\|\bar{\mathbf{w}}^j - \hat{\mathbf{w}}^j\|_1 \geq \|\bar{\mathbf{w}}^j\|_1 - \|\hat{\mathbf{w}}^j\|_1 \geq 2\theta - \theta = \theta.$$

Therefore, we have for each  $(j, i) \in \bar{\mathcal{F}} \setminus \bar{\mathcal{H}}$ :

$$I(\|\hat{\mathbf{w}}^j\|_1 < \theta) \leq \|\bar{\mathbf{w}}^j - \hat{\mathbf{w}}^j\|_1 / \theta.$$

Thus, the second inequality of Lemma 4 directly follows from the above inequality.  $\square$

#### B. Lemmas from Zhang (2010) [26]

**Lemma 5** Let  $\mathbf{a} \in \mathbb{R}^n$  be a fixed vector and  $\mathbf{x} \in \mathbb{R}^n$  be a random vector which is composed of independent sub-Gaussian components with parameter  $\sigma$ . Then we have:

$$\Pr(|\mathbf{a}^T \mathbf{x}| \geq t) \leq 2 \exp(-t^2 / (2\sigma^2 \|\mathbf{a}\|^2)), \forall t > 0.$$

**Lemma 6**  $\pi_i(k_i, s_i) \leq \frac{s_i^{1/2}}{2} \sqrt{\rho_i^+(s_i) / \rho_i^-(k_i + s_i)} - 1.$

**Lemma 7** Let  $\mathcal{G}_i \subseteq \mathbb{N}_d \times \{i\}$  such that  $|\mathcal{G}_i^c| = k_i$ , and let  $\mathcal{J}_i$  be indices of the  $s_i$  largest components (in absolute values) of  $\mathbf{w}_{\mathcal{G}_i}$  and  $\mathcal{I}_i = \mathcal{G}_i^c \cup \mathcal{J}_i$ . Then for any  $\mathbf{w}_i \in \mathbb{R}^d$ , we have

$$\max(0, \mathbf{w}_{\mathcal{I}_i}^T A_i \mathbf{w}_i) \geq \rho_i^-(k_i + s_i) (\|\mathbf{w}_{\mathcal{I}_i}\| - \pi_i(k_i + s_i, s_i) \|\mathbf{w}_{\mathcal{G}_i}\|_1 / s_i) \|\mathbf{w}_{\mathcal{I}_i}\|.$$

**Lemma 8** Let  $\bar{\epsilon}_i = [\bar{\epsilon}_{1i}, \dots, \bar{\epsilon}_{di}] = \frac{1}{n} X_i^T (X_i \bar{\mathbf{w}}_i - \mathbf{y}_i)$  ( $i \in \mathbb{N}_m$ ), and  $\bar{\mathcal{H}}_i \subseteq \mathbb{N}_d \times \{i\}$ . Under the conditions of Assumption 1, the followings hold with probability larger than  $1 - \eta$ :

$$\|\bar{\epsilon}_{\bar{\mathcal{H}}_i}\|^2 \leq \sigma^2 \rho_i^+(|\bar{\mathcal{H}}_i|) (7.4 |\bar{\mathcal{H}}_i| + 2.7 \ln(2/\eta)) / n.$$
